# Supplementary material for: Air Pollution and Respiratory Hospital Admissions in Kuwait: The Epidemiological Applicability of Predicted PM2.5 in Arid Regions
Source: MDPI journal article supplement (doi:10.3390/ijerph19105998), 2022-05-15
Supplement: s1 [file s1]

| % Increase in asthma admissions |       | 95 % CI |      |
|---------------------------------|-------|---------|------|
|                                 |       | Lo %    | Hi % |
| Kuwaiti                         | 1.36  | -0.82   | 3.58 |
| Non-Kuwaiti                     | 0.12  | -2.81   | 3.14 |
| Male                            | 0.73  | -1.68   | 3.20 |
| Female                          | 1.10  | -1.36   | 3.62 |
| < 15 yrs                        | 1.43  | -0.83   | 3.74 |
| 15-64 yrs                       | -0.49 | -3.90   | 3.04 |
| 65+ yrs                         | 2.52  | -2.22   | 7.50 |

\* = statistically significant (Sig. = 0.05)
