# Supplementary material for: Air Pollution and Respiratory Hospital Admissions in Kuwait: The Epidemiological Applicability of Predicted PM2.5 in Arid Regions
Source: MDPI journal article supplement (doi:10.3390/ijerph19105998), 2022-05-15
Supplement: s1 [file s1]

| Lag                 | % Increase in asthma admissions | 95 % CI |      |
|---------------------|---------------------------------|---------|------|
|                     |                                 | Lo %    | Hi % |
| Distributed Lags    |                                 |         |      |
| 0                   | 0.07                            | -0.98   | 1.14 |
| 1                   | 0.89                            | -0.20   | 2.00 |
| 2                   | -0.39                           | -1.54   | 0.77 |
| 3                   | 0.52                            | -0.59   | 1.64 |
| 4                   | 0.73                            | -0.41   | 1.88 |
| 5                   | -0.84                           | -1.97   | 0.30 |
| Cum 0-5             | 0.97                            | -0.85   | 2.82 |
| Moving Average Lags |                                 |         |      |
| 3                   | 1.00                            | -0.35   | 3.28 |
| 5                   | 1.63                            | 0.00    | 2.05 |

\* = statistically significant (Sig. = 0.05)
